# Supplementary material for: Validation of Aspartylglucosaminidase Activity Assay for Human Serum Samples: Establishment of a Biomarker for Diagnostics and Clinical Studies
Source: Preprints.org preprint supplement (doi:10.20944/preprints202302.0255.v1), 2023-02-15
Supplement: Supplementary file 1 [file supplementary]

# Supplementary Figure S1

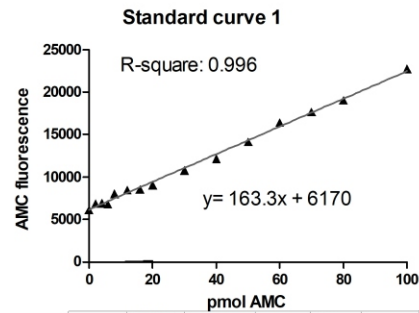

|     | pmol AMC<br>in serum<br>matrix | Fluorescence | pmol AMC   | % of<br>expected<br>value | % deviation |
|-----|--------------------------------|--------------|------------|---------------------------|-------------|
| S1  | 0                              | 6138         | -0.2267018 |                           |             |
| S2  | 2                              | 6891         | 4.3869861  | 219.35                    | 105.08      |
| S3  | 4                              | 6943         | 4.705594   | 117.64                    | 17.64       |
| S4  | 6                              | 6814         | 3.9152013  | 65.25                     | 15.71       |
| S5  | 8                              | 8006         | 11.341217  | 141.77                    | 41.77       |
| S6  | 12                             | 8466         | 14.03713   | 116.98                    | 16.98       |
| S7  | 16                             | 8544         | 14.515042  | 90.72                     | -9.28       |
| S8  | 20                             | 9042         | 17.566326  | 87.83                     | -12.17      |
| S9  | 30                             | 10825        | 28.490901  | 94.97                     | -5.03       |
| S10 | 40                             | 12153        | 36.627658  | 91.57                     | -8.43       |
| S11 | 50                             | 14125        | 48.710251  | 97.42                     | -2.58       |
| S12 | 60                             | 16427        | 62.814779  | 104.69                    | 4.69        |
| S13 | 70                             | 17686        | 70.528767  | 100.76                    | 0.76        |
| S14 | 80                             | 19027        | 78.745175  | 98.43                     | -1.57       |
| S15 | 100                            | 22770        | 101.67882  | 101.68                    | 1.68        |

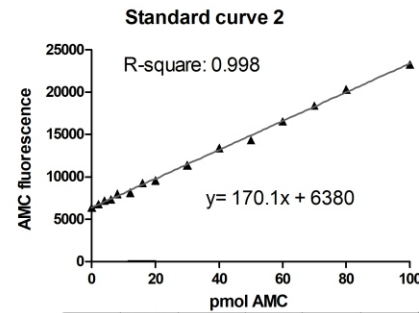

|     | pmol AMC<br>in serum<br>matrix | Fluorescence | pmol AMC   | % of<br>expected<br>value | % deviation |
|-----|--------------------------------|--------------|------------|---------------------------|-------------|
| S1  | 0                              | 6347         | -0.2235294 |                           |             |
| S2  | 2                              | 6805         | 2.4709824  | 123.53                    | 73.53       |
| S3  | 4                              | 7199         | 4.7882329  | 119.71                    | 19.71       |
| S4  | 6                              | 7325         | 5.52941176 | 92.16                     | -7.84       |
| S5  | 8                              | 7984         | 9.40588235 | 117.57                    | 17.57       |
| S6  | 12                             | 8134         | 10.2882353 | 85.74                     | -14.26      |
| S7  | 16                             | 9255         | 16.8823529 | 105.51                    | 5.51        |
| S8  | 20                             | 9603         | 18.9294118 | 94.65                     | -5.35       |
| S9  | 30                             | 11412        | 29.5705882 | 98.57                     | -1.43       |
| S10 | 40                             | 13424        | 41.4058824 | 103.51                    | 3.51        |
| S11 | 50                             | 14367        | 46.9529412 | 93.91                     | -6.09       |
| S12 | 60                             | 16558        | 59.8411765 | 99.74                     | -0.26       |
| S13 | 70                             | 18411        | 70.7411765 | 101.06                    | 1.06        |
| S14 | 80                             | 20328        | 82.0176471 | 102.52                    | 2.52        |
| S15 | 100                            | 23254        | 99.2294118 | 99.23                     | -0.77       |

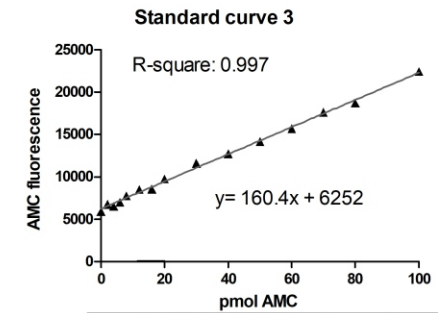

|     | pmol AMC<br>in serum<br>matrix | Fluorescence | pmol AMC   | % of<br>expected<br>value | % deviation |
|-----|--------------------------------|--------------|------------|---------------------------|-------------|
| S1  | 0                              | 5879         | -2.7358491 |                           |             |
| S2  | 2                              | 6744         | 2.7040252  | 135.22                    | 65.22       |
| S3  | 4                              | 6518         | 1.28301887 | 32.28                     |             |
| S4  | 6                              | 6995         | 4.28301887 | 71.38                     | -28.62      |
| S5  | 8                              | 7743         | 8.98742138 | 112.34                    | 12.34       |
| S6  | 12                             | 8532         | 13.9496855 | 116.25                    | 16.25       |
| S7  | 16                             | 8570         | 14.1886792 | 88.68                     | -11.32      |
| S8  | 20                             | 9753         | 21.6289308 | 108.14                    | 8.14        |
| S9  | 30                             | 11588        | 33.1698113 | 110.57                    | 10.57       |
| S10 | 40                             | 12736        | 40.327044  | 100.82                    | 0.82        |
| S11 | 50                             | 14147        | 49.2641509 | 98.93                     | -1.07       |
| S12 | 60                             | 15702        | 59.0440252 | 98.41                     | -1.59       |
| S13 | 70                             | 17638        | 71.2201258 | 101.74                    | 1.74        |
| S14 | 80                             | 18897        | 77.8805031 | 97.35                     | -2.65       |
| S15 | 100                            | 22423        | 101.314465 | 101.31                    | 1.31        |

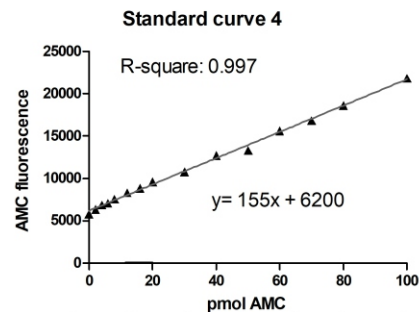

|     | pmol AMC<br>in serum<br>matrix | Fluorescence | pmol AMC   | % of<br>expected<br>value | % deviation |
|-----|--------------------------------|--------------|------------|---------------------------|-------------|
| S1  | 0                              | 5803         | -3.0064935 |                           |             |
| S2  | 2                              | 6143         | 0.5        | 25.00                     | 75.00       |
| S3  | 4                              | 6875         | 3.9545455  | 98.86                     | -1.14       |
| S4  | 6                              | 7064         | 5.1818182  | 86.36                     | -13.64      |
| S5  | 8                              | 7582         | 8.5454545  | 106.82                    | 6.82        |
| S6  | 12                             | 8305         | 13.24026   | 110.34                    | 10.34       |
| S7  | 16                             | 8874         | 16.935065  | 105.84                    | 5.84        |
| S8  | 20                             | 9599         | 21.640857  | 108.21                    | 8.21        |
| S9  | 30                             | 10784        | 29.337662  | 97.79                     | -2.21       |
| S10 | 40                             | 12744        | 42.064935  | 105.16                    | 5.16        |
| S11 | 50                             | 13292        | 45.623377  | 91.25                     | -8.75       |
| S12 | 60                             | 15643        | 60.88961   | 101.48                    | 1.48        |
| S13 | 70                             | 16852        | 68.74026   | 98.20                     | -1.80       |
| S14 | 80                             | 18606        | 80.12987   | 100.16                    | 0.16        |
| S15 | 100                            | 21847        | 101.17532  | 101.18                    | 1.18        |

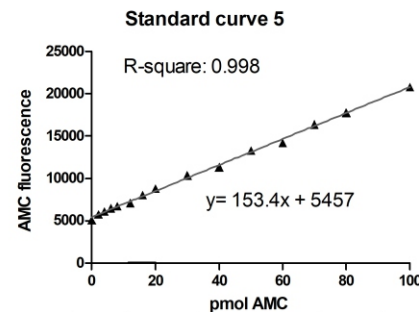

|     | pmol AMC<br>in serum<br>matrix | Fluorescence | pmol AMC   | % of<br>expected<br>value | % deviation |
|-----|--------------------------------|--------------|------------|---------------------------|-------------|
| S1  | 0                              | 5081         | -2.8815789 |                           |             |
| S2  | 2                              | 5799         | 1.57894737 | 78.95                     | -21.05      |
| S3  | 4                              | 6121         | 3.96052632 | 99.01                     | -0.99       |
| S4  | 6                              | 6501         | 6.46052632 | 107.68                    | 7.68        |
| S5  | 8                              | 6713         | 7.85526316 | 98.19                     | -1.81       |
| S6  | 12                             | 7111         | 10.4736842 | 87.28                     | -12.72      |
| S7  | 16                             | 8025         | 16.4868421 | 103.04                    | 3.04        |
| S8  | 20                             | 8806         | 21.625     | 108.13                    | 8.13        |
| S9  | 30                             | 10366        | 31.8881579 | 106.29                    | 6.29        |
| S10 | 40                             | 11327        | 38.2105263 | 95.53                     | -4.47       |
| S11 | 50                             | 13308        | 51.2434211 | 102.49                    | 2.49        |
| S12 | 60                             | 14206        | 57.1513158 | 95.25                     | -4.75       |
| S13 | 70                             | 16366        | 71.3618421 | 101.95                    | 1.95        |
| S14 | 80                             | 17760        | 80.5328947 | 100.67                    | 0.67        |
| S15 | 100                            | 20771        | 100.342105 | 100.34                    | 0.34        |

**Supplementary Figure S1: Linearity and lower limit of quantification (LLOQ).** AMC-standards were pipetted as outlined in Table 1. Raw AMC fluorescence (in artificial units) was related to the corresponding AMC amount in pmol. The slope, y-intercept and, R-square were calculated by linear regression analysis. The data for the independent experiments used for Figure 1 are shown. Concentrations of the calibration standards were back-calculated. Green numbers indicate back-calculation of the standards within the requested limits ( $\pm 15\%$  of the nominal value, for LLOQ  $\pm 20\%$ ), yellow colors refer to back calculations close, but outside the requested range, and red colors indicate values where back-calculation was inaccurate. LLOQ of each standard curve was determined to range between 2 and 6 pmol (= uppermost green AMC standard) and was averaged to obtain the mean LLOQ (i.e. 4.8 pmol AMC).

**Supplementary Table S1:** Coefficients of variation (CV) of the individual measurements of within-run and between-run precision.

| Within-run precision<br>(Data from Figure 3) |        | Between-run precision<br>healthy donors<br>(Data from Figure 4A) |        | Between-run precision<br>Patients<br>(Data from Figure 4B) |        |
|----------------------------------------------|--------|------------------------------------------------------------------|--------|------------------------------------------------------------|--------|
| Sample ID                                    | CV (%) | Sample ID                                                        | CV (%) | Sample ID                                                  | CV (%) |
| Healthy donor 2                              | 3.73   | Healthy donor 1                                                  | 8.21   | Patient 1                                                  | 9.81   |
| Healthy donor 3                              | 3.22   | Healthy donor 2                                                  | 6.98   | Patient 2                                                  | 48.94  |
| Healthy donor 5                              | 1.06   | Healthy donor 3                                                  | 9.25   | Patient 3                                                  | 17.63  |
| Healthy donor 6                              | 3.57   | Healthy donor 4                                                  | 4.93   | Patient 4                                                  | 105.82 |
| Healthy donor 8                              | 1.81   | Healthy donor 5                                                  | 6.54   | Patient 5                                                  | 52.14  |
| Healthy donor 10                             | 4.45   | Healthy donor 6                                                  | 10.09  | Patient 6                                                  | 26.19  |
| Patient 1                                    | 6.83   | Healthy donor 8                                                  | 12.76  | Patient 7                                                  | 22.31  |
| Patient 7                                    | 3.68   | Healthy donor 10                                                 | 7.23   | Patient 8                                                  | 65.24  |
| Patient 8                                    | 5.22   |                                                                  |        | Patient 9                                                  | 128.58 |
| Patient 14                                   | 5.98   |                                                                  |        | Patient 10                                                 | 19.74  |
| Patient 18                                   | 5.16   |                                                                  |        | Patient 11                                                 | 23.66  |
| Patient 19                                   | 14.78  |                                                                  |        | Patient 12                                                 | 86.78  |
|                                              |        |                                                                  |        | Patient 13                                                 | 32.81  |
|                                              |        |                                                                  |        | Patient 14                                                 | 66.66  |
|                                              |        |                                                                  |        | Patient 15                                                 | 62.11  |
|                                              |        |                                                                  |        | Patient 16                                                 | 43.14  |
|                                              |        |                                                                  |        | Patient 17                                                 | 65.04  |
|                                              |        |                                                                  |        | Patient 18                                                 | 37.23  |
|                                              |        |                                                                  |        | Patient 19                                                 | 47.03  |
|                                              |        |                                                                  |        | Patient 20                                                 | 41.37  |
